# Supplementary material
Source: PubMed Central journal article supplement (PMC2962692)
Supplement: NIHMS224671-supplement-Supp_Data.pdf [file NIHMS224671-supplement-Supp_Data.pdf]

## SUPPLEMENT: Further properties of SNI distributions

From Proposition 1 in [20], the SN distribution defined in (1) has a convenient stochastic representation:

$$\mathbf{Y} = \boldsymbol{\mu} + \boldsymbol{\Lambda}|\mathbf{T}_1| + \boldsymbol{\Sigma}^{1/2}\mathbf{T}_2, \quad (\text{S-1})$$

where  $\mathbf{T}_1$  and  $\mathbf{T}_2$  are two independent  $N_p(0, \mathbf{I}_p)$  random vectors. Here,  $|\cdot|$  denotes the absolute value. If  $\mathbf{Y} \sim SNI_{p,p}(\boldsymbol{\mu}, \boldsymbol{\Sigma}, \boldsymbol{\Lambda}, H)$ , the mean vector and the covariance matrix of a SNI random vector are

$$E\{\mathbf{Y}\} = \boldsymbol{\mu} + \sqrt{\frac{2}{\pi}}, \quad \text{Var}\{\mathbf{Y}\} = E\{U^{-1}\} \left( \boldsymbol{\Omega} + \frac{2}{\pi}(\boldsymbol{\lambda}\boldsymbol{\lambda}^\top - \boldsymbol{\Lambda}\boldsymbol{\Lambda}^\top) \right) - \frac{2}{\pi}E^2\{U^{-1/2}\}\boldsymbol{\lambda}\boldsymbol{\lambda}^\top.$$

Some members of the SNI class follows.

- (i) *Multivariate skew-normal (SN) distribution.* This is the case when  $U = 1$  (a degenerate random variable) in (3).
- (ii) *Multivariate skew-t (ST) distribution.* It is derived from (3) by taking  $U \sim \text{Gamma}(\nu/2, \nu/2)$ ,  $\nu > 0$  and is denoted as  $St_{p,p}(\boldsymbol{\mu}, \boldsymbol{\Sigma}, \boldsymbol{\Lambda}, \nu)$ . It follows from Proposition 1 given in [8] that the pdf of  $\mathbf{Y}$  is:

$$f(\mathbf{y}) = 2^p t_p(\mathbf{y}; \boldsymbol{\mu}, \boldsymbol{\Omega}, \nu) T_p \left( \sqrt{\frac{p+\nu}{d+\nu}} \mathbf{A}; \boldsymbol{\Delta}, \nu+p \right), \quad \mathbf{y} \in \mathbb{R}^p, \quad (\text{S-2})$$

where  $\mathbf{A} = \boldsymbol{\Lambda}^\top \boldsymbol{\Omega}^{-1}(\mathbf{y} - \boldsymbol{\mu})$  and  $d = (\mathbf{Y} - \boldsymbol{\mu})^\top \boldsymbol{\Omega}^{-1}(\mathbf{Y} - \boldsymbol{\mu})$  is the Mahalanobis distance,  $t_p(\cdot; \boldsymbol{\mu}, \boldsymbol{\Sigma}, \nu)$  denotes the  $p$ -dimensional multivariate Student- $t$  distribution with location  $\boldsymbol{\mu}$ , scale matrix  $\boldsymbol{\Sigma}$  and degrees of freedom (df)  $\nu$ , and  $T_p(\cdot; \boldsymbol{\Sigma}; \nu)$  is the cdf of  $t_p(\cdot; \mathbf{0}, \boldsymbol{\Sigma}, \nu)$ . A particular case of the skew- $t$  distribution is the skew-Cauchy distribution, when  $\nu = 1$ . Also, when  $\nu \uparrow \infty$ , we have the SN distribution as the limiting case. Applications of the ST distribution to robust estimation can be found in [8, 18].

- (iii) *Multivariate skew-slash (SSL) distribution.* It is derived from (3), choosing  $U \sim \text{Beta}(\nu, 1)$ ,  $\nu > 0$ . It is denoted by  $SSL_{p,p}(\boldsymbol{\mu}, \boldsymbol{\Sigma}, \boldsymbol{\Lambda}, \nu)$  and the p.d.f is given by

$$f(\mathbf{y}) = 2^p \nu \int_0^1 u^{\nu-1} \phi_p(\mathbf{y}; \boldsymbol{\mu}, u^{-1}\boldsymbol{\Omega}) \Phi_p(u^{1/2} \mathbf{A}; \boldsymbol{\Delta}) du, \quad \mathbf{y} \in \mathbb{R}^p. \quad (\text{S-3})$$

. The SL distribution reduces to the SN distribution when  $\nu \uparrow \infty$ .

- (iv) *Multivariate skew contaminated normal (SCN) distribution.* This arises when the mixing scale factor  $U$  is a discrete random variable taking one of two states, i.e. either  $\nu_2$  or 1, with  $\boldsymbol{\nu} = (\nu_1, \nu_2)^\top$ . It is denoted by  $SCN_{p,p}(\boldsymbol{\mu}, \boldsymbol{\Sigma}, \boldsymbol{\Lambda}, \nu_1, \nu_2)$ . The probability function of  $U$  is

$$h(u|\boldsymbol{\nu}) = \nu_1 \mathbb{I}_{\{\nu_2\}}(u) + (1 - \nu_1) \mathbb{I}_{\{1\}}(u), \quad 0 < \nu_1 < 1, \quad 0 < \nu_2 \leq 1. \quad (\text{S-4})$$

It then follows that

$$f(\mathbf{y}) = 2^p \left\{ \nu_1 \phi_p(\mathbf{y}; \boldsymbol{\mu}, \nu_2^{-1}\boldsymbol{\Omega}) \Phi_p(\nu_2^{1/2} \mathbf{A}; \boldsymbol{\Delta}) + (1 - \nu_1) \phi_p(\mathbf{y}; \boldsymbol{\mu}, \boldsymbol{\Omega}) \Phi_p(\mathbf{A}; \boldsymbol{\Delta}) \right\}.$$

Parameter  $\nu_1$  can be interpreted as the proportion of outliers while  $\nu_2$  may be interpreted as a scale factor. The SCN distribution reduces to the SN distribution when  $\nu_2 = 1$ .
